# Supplementary material for: Pan-sarcoma characterization of lncRNAs in the crosstalk of EMT and tumor immunity identifies distinct clinical outcomes and potential implications for immunotherapy
Source: Research Square preprint supplement (doi:10.21203/rs.3.rs-1540777/v1), 2022-04-20
Supplement: Supplementary file 1 [file 8ad92909b7ea957ff6093ff9.xlsx]

## Sheet: Sheet 1
EILncSig of ICB therapy cohort GSE176307 (optimal cutoff: 1.207528)
ID	Sample ID	Sample_geo_accession	LINC01140	ENSG00000260101 (RP11-568N6)	LBX2-AS1	ENSG00000254231 (CTD-2284J15)	MIR22HG	MIR155HG	MCM3AP-AS1	EILncSig_Score	OS.Time	OS.Status	Response	PFS.Time	PFS.Status	EILncSig_level
RS-03238953	BACI170	GSM5362514	5.8565	4.35606	10.3836	4.35606	8.05417	4.68252	7.5969	0.829976	65	1	PD	7	1	Low
RS-03238954	BACI191	GSM5362532	5.92497	4.35606	9.17512	4.8922	7.36853	6.33223	9.16795	1.75227	407	0	SD	188	1	High
RS-03238955	BACI192	GSM5362533	6.2097	4.35606	8.78178	4.35606	7.14206	4.35606	8.52223	1.19742	126	1	PR	81	1	Low
RS-03238956	BACI190	GSM5362531	6.43411	4.35606	7.76663	4.35606	5.47039	5.62132	9.171	2.18411	97	1	PD	51	1	High
RS-03238957	BACI160	GSM5362505	5.64708	4.35606	8.53076	4.79916	7.85126	5.74343	8.29531	1.31113	416	1	PD	38	1	High
RS-03238958	BACI209	GSM5362548	5.80406	4.35606	8.09967	4.68476	8.05958	5.15278	7.92572	1.08805	236	0	CR	236	0	Low
RS-03238959	BACI114	GSM5362470	5.4903	4.35606	8.20722	4.35606	9.41114	5.89769	7.76786	1.05304	284	0	PR	284	0	Low
RS-03238960	BACI107	GSM5362464	5.30196	4.78512	8.60813	4.35606	8.71562	5.76033	8.9761	1.17585	699	0	CR	699	0	Low
RS-03238961	BACI136	GSM5362485	5.68968	4.67239	8.20245	4.67239	8.89483	5.65637	8.56947	1.03704	51	1	PD	44	1	Low
RS-03238962	BACI207	GSM5362546	6.31497	4.79028	7.80213	4.35606	8.14191	5.26552	8.22124	0.903179	126	0	PR	126	0	Low
RS-03238963	BACI173	GSM5362516	5.73967	4.35606	8.5965	4.64893	7.66055	5.88971	8.04786	1.28866	33	0	PD	3	1	High
RS-03238964	BACI165	GSM5362510	6.58269	4.35606	8.53882	4.66468	7.54229	5.40401	8.55338	1.26399	486	0	PD	60	1	High
RS-03238965	BACI189	GSM5362530	6.94977	4.35606	9.12033	4.67249	8.41539	5.18355	7.45997	0.764477	137	1	PD	11	1	Low
RS-03238966	BACI112	GSM5362468	6.71015	4.65652	8.62459	4.35606	8.49473	6.50324	8.32398	1.05092	453	0	CR	453	0	Low
RS-03238967	BACI111	GSM5362467	5.91988	4.35606	7.89764	4.65037	7.34326	6.2047	8.78218	1.74006	727	1	PR	727	1	High
RS-03238968	BACI131	GSM5362482	5.54661	4.35606	8.58294	4.68266	8.52201	5.50549	7.38399	0.939517	866	0	PD	148	1	Low
RS-03238969	BACI128	GSM5362481	5.85002	4.66778	7.91727	4.97593	6.3559	5.67141	8.91162	1.50644	14	1	PD	14	1	High
RS-03238970	BACI120	GSM5362475	6.24381	4.35606	8.05893	5.00761	8.1431	5.21269	7.82038	0.974047	755	0	CR	357	1	Low
RS-03238971	BACI186	GSM5362527	7.04631	4.35606	8.5529	4.66993	10.1551	5.64683	8.03989	0.788217	727	0	CR	514	1	Low
RS-03238972	BACI154	GSM5362499	5.40453	4.35606	8.11737	4.66484	8.37749	5.65976	8.35684	1.32059	118	1	PD	88	1	High
RS-03238973	BACI133	GSM5362483	6.98231	4.35606	7.67897	4.66866	9.21735	5.57254	7.61581	0.835171	704	1	PD	74	1	Low
RS-03238974	BACI167	GSM5362512	6.21381	4.35606	10.5836	4.85867	8.17655	5.60462	6.53817	0.639673	83	1	PD	54	1	Low
RS-03238975	BACI204	GSM5362543	7.12225	4.79527	7.96389	4.79527	8.99891	6.13717	8.13659	0.777127	198	1	PD	5	1	Low
RS-03238976	BACI137	GSM5362486	5.63614	4.78357	8.96903	4.35606	7.22453	5.53646	8.39178	1.10641	82	1	PD	39	1	Low
RS-03238977	BACI118	GSM5362473	7.51438	4.65087	7.98779	4.65087	8.09645	6.39271	8.35003	1.01081	339	1	PD	124	1	Low
RS-03238978	BACI184	GSM5362525	6.69648	4.67614	8.45322	4.67614	8.69147	5.56277	8.23703	0.843062	98	1	PD	67	1	Low
RS-03238979	BACI205	GSM5362544	5.61438	4.35606	8.6405	4.79972	7.22317	5.4642	8.28953	1.35243	455	0	PD	165	1	High
RS-03238980	BACI201	GSM5362540	6.73107	5.08397	8.76753	4.87347	7.43824	5.55918	7.86184	0.663538	190	0	PD	65	1	Low
RS-03238981	BACI159	GSM5362504	6.10101	4.66435	9.61103	4.66435	6.38938	5.55663	8.52869	1.20753	473	0	PR	473	0	High
RS-03238982	BACI144	GSM5362492	5.6718	4.35606	8.90915	4.35606	8.17281	5.94275	8.35344	1.34587	44	1	PD	30	1	High
RS-03238983	BACI183	GSM5362524	5.87471	4.35606	8.3143	4.35606	8.27874	6.40756	8.3182	1.43191	110	1	PD	49	1	High
RS-03238984	BACI157	GSM5362502	5.6669	4.35606	8.62166	4.35606	7.3129	5.12987	7.62742	1.11998	214	1	PR	126	1	Low
RS-03238985	BACI219	GSM5362553	7.34406	4.35606	7.67709	4.77459	8.31383	5.88309	8.31383	1.1116	203	0	PD	109	1	Low
RS-03238986	BACI142	GSM5362490	4.81449	4.91636	8.58077	4.6809	7.64726	5.07645	7.75665	0.832703	125	1	PD	57	1	Low
RS-03238987	BACI169	GSM5362513	6.98076	4.35606	8.0257	4.64578	7.72909	6.95128	8.52669	1.52762	145	1	PD	57	1	High
RS-03238988	BACI202	GSM5362541	6.06202	4.35606	9.19364	4.35606	8.19426	5.54404	8.59233	1.26499	102	1	PD	102	1	High
RS-03238989	BACI177	GSM5362519	5.04408	4.89099	7.3464	4.35606	7.67298	5.16714	8.52089	1.1381	162	1	PD	75	1	Low
RS-03238990	BACI197	GSM5362538	5.29924	4.35606	7.47044	4.78385	8.3817	5.5372	8.43199	1.37609	137	1	PD	52	1	High
RS-03238991	BACI143	GSM5362491	5.08767	4.35606	8.53203	4.35606	8.18641	5.15583	7.58169	1.07118	71	1	PD	18	1	Low
RS-03238992	BACI178	GSM5362520	5.56024	4.87394	9.06689	4.87394	8.96517	5.49083	8.74921	0.872188	472	0	PD	154	1	Low
RS-03238993	BACI117	GSM5362472	5.4943	4.66761	7.83284	4.66761	6.76841	5.8493	8.88406	1.57976	17	1	PD	17	1	High
RS-03238994	BACI199	GSM5362539	7.09934	4.81018	8.09091	4.81018	8.27454	5.48927	7.99523	0.732011	1	1	PD	1	1	Low
RS-03238995	BACI174	GSM5362517	6.38046	4.90146	7.59093	4.90146	8.43378	5.78295	8.43791	0.881293	199	1	PD	199	1	Low
RS-03238996	BACI126	GSM5362480	6.00606	4.35606	7.96095	4.81148	5.86985	5.81044	9.18344	2.11597	55	1	PD	3	1	High
RS-03238997	BACI212	GSM5362551	6.28844	4.66903	7.1846	4.35606	9.53312	5.76968	8.3098	0.943289	101	1	PD	69	1	Low
RS-03238999	BACI153	GSM5362498	6.34968	4.35606	8.19787	4.35606	7.52377	5.86141	7.99318	1.27226	68	1	PD	41	1	High
RS-03239000	BACI163	GSM5362508	7.10113	4.35606	9.54108	4.35606	8.20167	5.33713	7.22255	0.747791	323	0	PD	183	1	Low
RS-03239002	BACI151	GSM5362496	5.81936	4.35606	8.34744	4.35606	7.98001	5.59997	7.70705	1.12964	584	0	PR	338	1	Low
RS-03239003	BACI175	GSM5362518	8.08237	4.35606	7.69564	4.35606	8.01088	6.23641	8.44927	1.21132	46	1	PD	5	1	High
RS-03239004	BACI139	GSM5362488	5.42277	4.35606	8.64087	4.35606	8.10177	5.74526	8.26711	1.34903	195	1	PD	84	1	High
RS-03239005	BACI124	GSM5362479	6.75544	4.35606	9.07777	4.65034	8.20126	4.65034	6.43559	0.571438	390	1	PD	39	1	Low
RS-03239006	BACI113	GSM5362469	5.8737	4.96302	8.35137	4.96302	7.33622	5.613	8.28458	0.91175	295	0	PR	295	0	Low
RS-03239007	BACI155	GSM5362500	6.7133	4.35606	8.1002	4.79859	9.216	5.42002	8.06906	0.908508	204	1	PD	63	1	Low
RS-03239008	BACI109	GSM5362465	6.20041	4.35606	7.39598	4.67539	8.07197	5.70155	7.8103	1.1454	304	0	SD	304	0	Low
RS-03239009	BACI123	GSM5362478	5.54764	4.68295	7.63142	4.35606	8.44326	5.88795	7.55975	0.946603	252	0	PD	40	1	Low
RS-03239010	BACI182	GSM5362523	6.6328	4.35606	10.0642	4.86786	7.80733	4.35606	7.05377	0.626495	107	1	PD	31	1	Low
RS-03239011	BACI172	GSM5362515	5.90647	4.97714	9.34701	4.89496	7.84501	5.60682	8.47506	0.839174	605	0	PR	196	1	Low
RS-03239012	BACI152	GSM5362497	5.94037	4.67012	8.2179	4.35606	7.91227	5.64757	8.40857	1.12847	402	0	SD	339	1	Low
RS-03239013	BACI208	GSM5362547	5.65589	4.66387	8.97801	4.96824	7.82779	5.65589	8.76757	1.15732	252	0	CR	252	0	Low
RS-03239014	BACI156	GSM5362501	6.21963	4.675	7.4278	4.675	7.96766	5.06358	8.11173	0.934409	17	1	PD	17	1	Low
RS-03239015	BACI180	GSM5362521	6.53258	4.35606	8.98237	4.35606	8.04953	5.60958	8.37107	1.18037	250	1	SD	195	1	Low
RS-03239016	BACI185	GSM5362526	5.06454	4.67544	6.9927	4.67544	7.88694	5.39491	8.84001	1.40139	174	1	PD	84	1	High
RS-03239017	BACI119	GSM5362474	5.9312	4.67384	8.25711	4.67384	7.18805	5.62739	9.0953	1.41427	291	1	PD	82	1	High
RS-03239018	BACI164	GSM5362509	5.32732	4.35606	8.55492	4.9238	8.91713	5.01025	8.00397	0.976795	533	0	PD	261	1	Low
RS-03239019	BACI211	GSM5362550	6.20346	5.03173	6.83461	4.66043	6.9381	5.76217	9.18908	1.30191	83	1	PD	27	1	High
RS-03239020	BACI193	GSM5362534	7.16375	4.35606	9.16726	4.67325	8.66772	5.43194	8.35274	0.943002	69	1	PD	22	1	Low
RS-03239021	BACI188	GSM5362529	5.19761	4.35606	7.44913	4.678	8.25169	5.56942	8.60764	1.50658	208	1	PD	45	1	High
RS-03239022	BACI196	GSM5362537	6.74048	4.35606	8.17482	4.35606	6.79379	5.11661	8.48846	1.35811	70	1	PD	53	1	High
RS-03239023	BACI161	GSM5362506	5.2592	4.35606	9.28003	4.35606	8.85451	5.8455	8.6118	1.33424	187	1	PD	61	1	High
RS-03239024	BACI149	GSM5362494	5.53759	4.66911	7.94495	4.35606	9.19767	5.22983	8.68533	1.03661	109	0	PD	25	1	Low
RS-03239025	BACI138	GSM5362487	5.94342	4.35606	8.60624	4.35606	8.52992	4.68261	7.71187	0.894964	868	0	CR	868	0	Low
RS-03239026	BACI206	GSM5362545	7.81466	4.35606	8.22639	4.94643	7.30633	6.38829	8.37795	1.23909	150	1	PD	116	1	High
RS-03239027	BACI162	GSM5362507	6.60114	4.66772	7.79652	4.35606	6.97607	4.97582	8.24518	1.04951	165	1	PD	63	1	Low
RS-03239028	BACI181	GSM5362522	5.50022	4.35606	8.44689	4.35606	7.91767	5.46055	7.73121	1.15572	125	1	PD	63	1	Low
RS-03239029	BACI158	GSM5362503	5.77834	5.01252	8.26737	4.92578	9.46302	5.59944	8.10649	0.662001	31	1	PD	14	1	Low
RS-03239030	BACI217	GSM5362552	5.26912	4.79204	8.51128	4.35606	8.03711	6.01389	8.55181	1.19575	86	0	NA	NA	NA	Low
RS-03239031	BACI195	GSM5362536	6.79235	4.35606	7.52067	4.35606	7.64715	6.11622	7.58533	1.1633	132	1	PD	122	1	Low
RS-03239032	BACI116	GSM5362471	5.89156	4.35606	8.10051	4.35606	8.6522	5.46621	9.10843	1.4772	191	1	PD	61	1	High
RS-03239033	BACI187	GSM5362528	5.88378	4.35606	8.20776	4.91822	8.28782	5.36805	7.97336	1.06105	153	1	PD	63	1	Low
RS-03239034	BACI122	GSM5362477	6.11174	4.35606	8.07225	4.35606	7.74372	5.79652	8.07768	1.29802	12	1	PD	12	1	High
RS-03239035	BACI203	GSM5362542	6.6019	4.68096	7.77798	5.00183	8.31817	5.90806	8.43624	0.993569	401	1	PD	63	1	Low
RS-03239036	BACI110	GSM5362466	5.01141	4.35606	7.77875	4.35606	7.78586	5.59743	8.29809	1.53104	288	1	PD	115	1	High
RS-03239037	BACI210	GSM5362549	5.3768	4.35606	8.42751	4.35606	8.03137	6.03452	8.45863	1.521	76	0	PD	44	1	High
RS-03239038	BACI140	GSM5362489	8.07656	4.35606	8.18703	4.35606	8.46573	5.4509	8.00846	0.881904	185	0	PD	106	1	Low
RS-03239039	BACI121	GSM5362476	4.69485	4.35606	7.08139	4.35606	8.20359	5.35471	8.67872	1.67788	327	0	PD	83	1	High
RS-03239040	BACI194	GSM5362535	5.9922	4.35606	7.92569	4.82356	8.24904	5.52126	8.54234	1.28441	200	0	PD	49	1	High
RS-03239041	BACI148	GSM5362493	6.13717	4.35606	6.58869	4.35606	8.8788	5.19239	7.68462	1.0223	31	1	PD	27	1	Low
RS-03239042	BACI150	GSM5362495	6.05109	4.66779	8.23188	5.04782	6.98775	6.20275	9.22148	1.55328	37	1	PD	17	1	High
RS-03239043	BACI135	GSM5362484	6.49043	5.12506	8.65225	4.90301	7.94708	5.69247	8.13824	0.687016	53	1	PD	22	1	Low

## Sheet: Sheet 2
	Connectivity	P Value
irinotecan	0.40331	0.0212854
isotretinoin	0.337785	0.00374694
primaquine	0.31814	0.0139554
ionomycin	0.317325	0.0482745
thioguanosine	0.31078	0.0314917
phenoxybenzamine	0.30915	0.0414568
oxedrine	0.30705	0.0223184
tretinoin	0.306715	0.0357263
amphotericin B	0.296895	0.0028159
tetraethylenepentamine	0.296175	0.0207186
clorgiline	0.293335	0.00775217
0179445-0000	0.29319	0.0321703
desoxycortone	0.29146	0.0203116
(-)-isoprenaline	0.28551	0.0322221
mefloquine	0.28543	0.0445678
hexestrol	0.28212	0.0067912
niclosamide	0.28181	0.0337184
benzethonium chloride	0.27962	0.0392014
isoconazole	0.2785	0.0171661
16-phenyltetranorprostaglandin E2	0.275525	0.0232033
abamectin	0.27412	0.0198789
promethazine	0.272665	0.0223939
hexetidine	0.272645	0.0067294
propantheline bromide	0.272185	0.00621765
amantadine	0.27142	0.0186424
triflusal	0.26816	0.0261453
leflunomide	0.26814	0.0126946
enilconazole	0.26791	0.0380766
clemizole	0.26529	0.0478693
haloperidol	0.26168	0.0280848
hydroxyachillin	0.261595	0.011382
chlorcyclizine	0.259895	0.0315587
terbutaline	0.255585	0.0225879
nimodipine	0.254925	0.0431533
fenbufen	0.254905	0.0311946
cefadroxil	0.25406	0.0400706
oxybuprocaine	0.25397	0.0377731
mifepristone	0.253205	0.0242106
methylergometrine	0.2517	0.0447446
prednicarbate	0.25041	0.0364779
meclozine	0.24998	0.0255671
pyrazinamide	0.24622	0.0324212
hesperetin	0.23693	0.0403189
pancuronium bromide	0.236785	0.0340686
amoxapine	0.23211	0.0404076
butacaine	-0.23605	0.0401832
sulfadoxine	-0.239535	0.0444834
harpagoside	-0.249385	0.0212647
pinacidil	-0.25747	0.0387812
velnacrine	-0.2586	0.0314128
oxolamine	-0.2613	0.0495106
altretamine	-0.261745	0.00404063
dicloxacillin	-0.26261	0.0303466
scopolamine N-oxide	-0.26457	0.0255882
ornidazole	-0.267365	0.00669286
topiramate	-0.26875	0.0458376
pindolol	-0.270665	0.00817613
chloramphenicol	-0.284035	0.0287863
sulindac	-0.28493	0.0388471
sulfaphenazole	-0.284975	0.0161063
fosfosal	-0.29458	0.0295615
moroxydine	-0.30374	0.00324133
